# Supplementary material for: Prep1 prevents premature adipogenesis of mesenchymal progenitors
Source: PubMed Central journal article supplement (PMC5686065; doi:10.1038/s41598-017-15828-1), 2017-11-14
Supplement: 41598_2017_15828_MOESM1_ESM.pdf [file 41598_2017_15828_MOESM1_ESM.pdf]

## **Prep1 prevents premature adipogenesis of mesenchymal progenitors**

Maroni<sup>1#§</sup>G, Tkachuk<sup>2</sup>V, Egorov<sup>2</sup> A, Morelli<sup>3</sup> MJ, Luongo<sup>1°</sup> R, Levantini<sup>1,4</sup>E, Blasi<sup>5</sup>F, Magli<sup>1</sup> MC and Penkov<sup>5,2,6\*</sup> D.

1. Institute of Biomedical Technologies, National Research Council (CNR), Via Moruzzi, 1, 56124 Pisa, Italy.
2. Lomonosov Moscow State University, Leninskiye Gory 1, 119991, Moscow, Russia.
3. Center for Genomic Science of IIT@SEMM, Fondazione Istituto Italiano di Tecnologia (IIT), via Adamello 16, 20139 Milano, Italy
4. Beth Israel Deaconess Medical Center, 330 Blackfan Circle, CLS 428, Boston 02215 MA, USA
5. IFOM (Fondazione FIRC Institute of Molecular Oncology), via Adamello 16, 20139, Milano Italy.
6. National Medical Research Center for Cardiology, 3rd Cherepkovskaya Street 15A, 121552, Moscow, Russia.

§ Present address: Beth Israel Deaconess Medical Center, 330 Blackfan Circle, CLS 428, Boston 02215 MA, USA

° Present address: European Institute of Oncology, via Adamello 16, 20139, Milano, Italy.

\*corresponding author: Dmitry Penkov

dmitry.penkov@ifom.eu

K 24h 48h 72h 6D

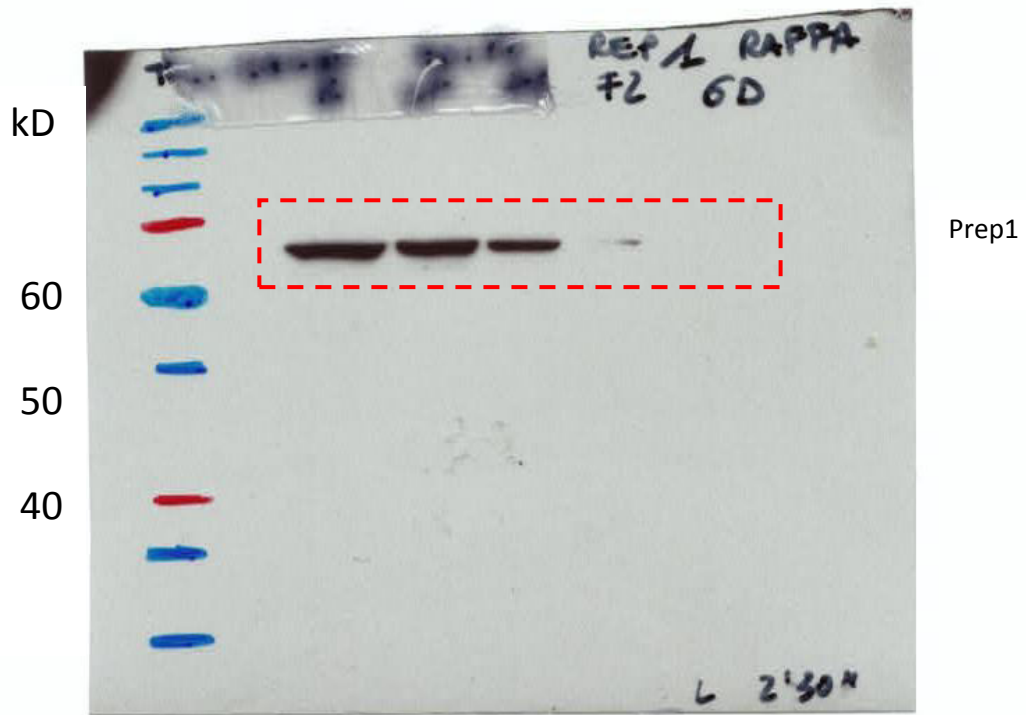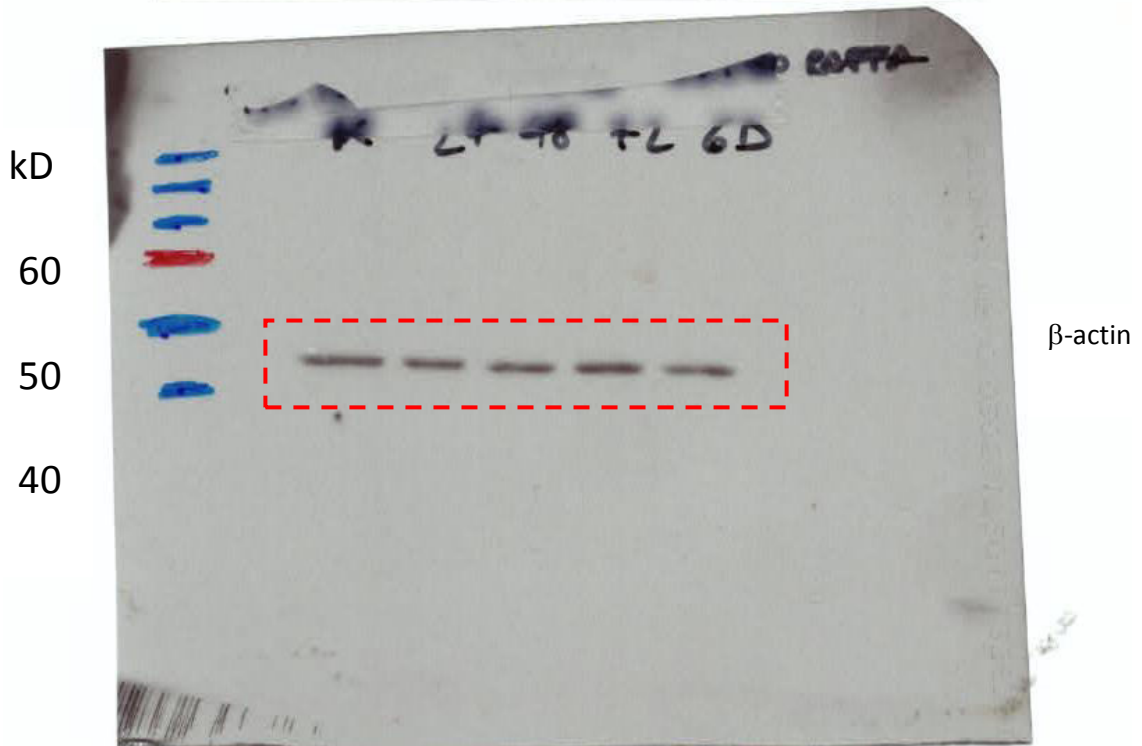

Figure S1. Full-length blots for Figure 1A.

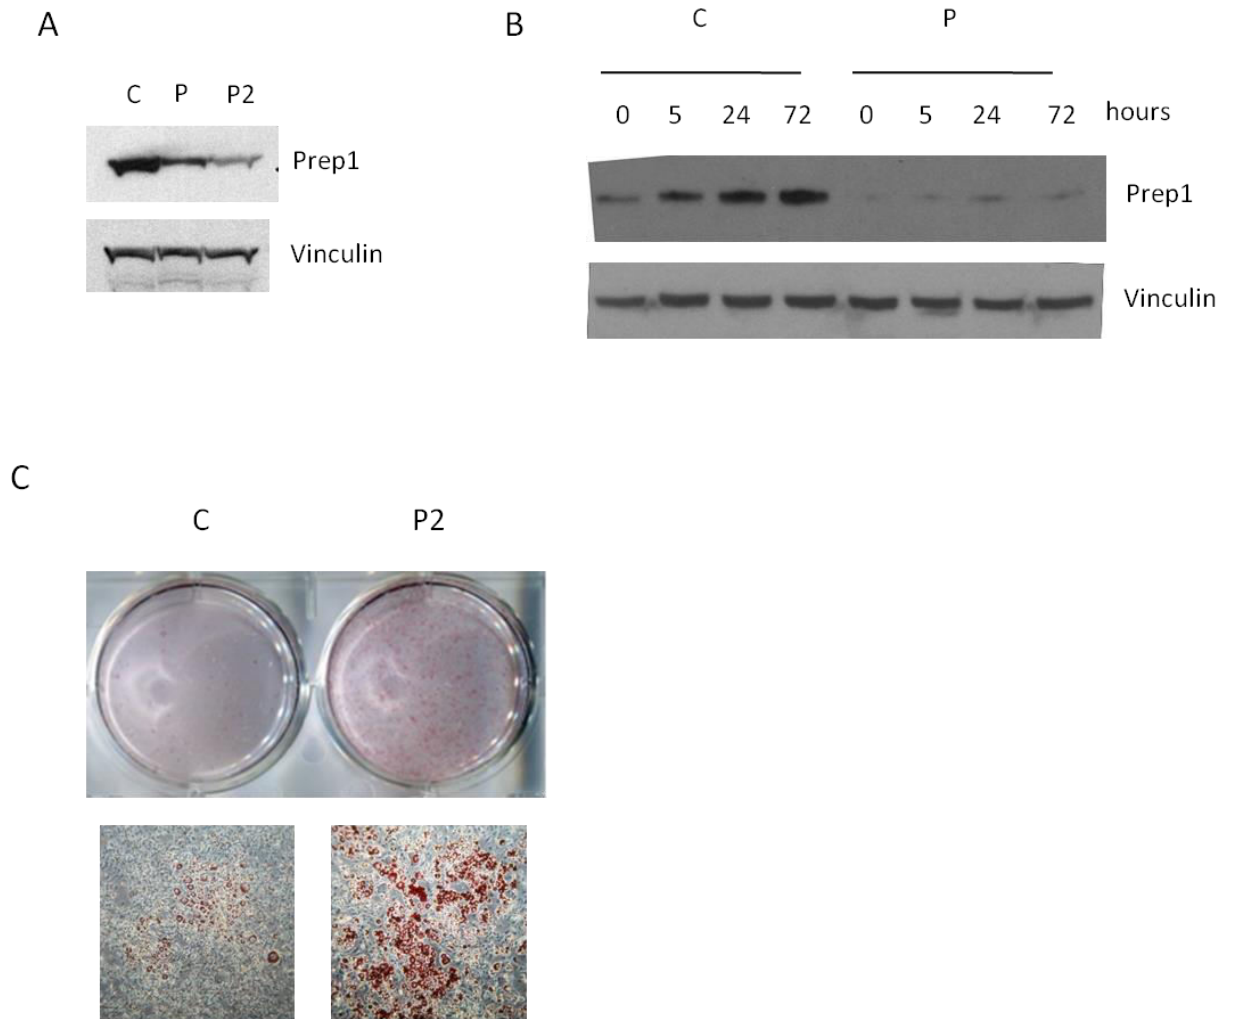

**Figure S2. Prep1 down-regulation with an additional Prep1 shRNA (P2) increases adipogenic differentiation in 3T3-L1 cells.**

A. Immunoblotting analysis of cell extracts from C, P and P2 cells before differentiation using anti-Prep1 Ab. Vinculin Ab was used as loading control. B. Immunoblotting analysis of cell extracts from C and P cells at different time points after induction using anti-Prep1 Ab. Vinculin Ab was used as loading control. C. Oil-red O staining of 3T3-L1 control (C) and Prep1 down-regulated (P2) cells using shRNA2 6 days after induction. In the bottom panels the cells are shown at a greater magnification.

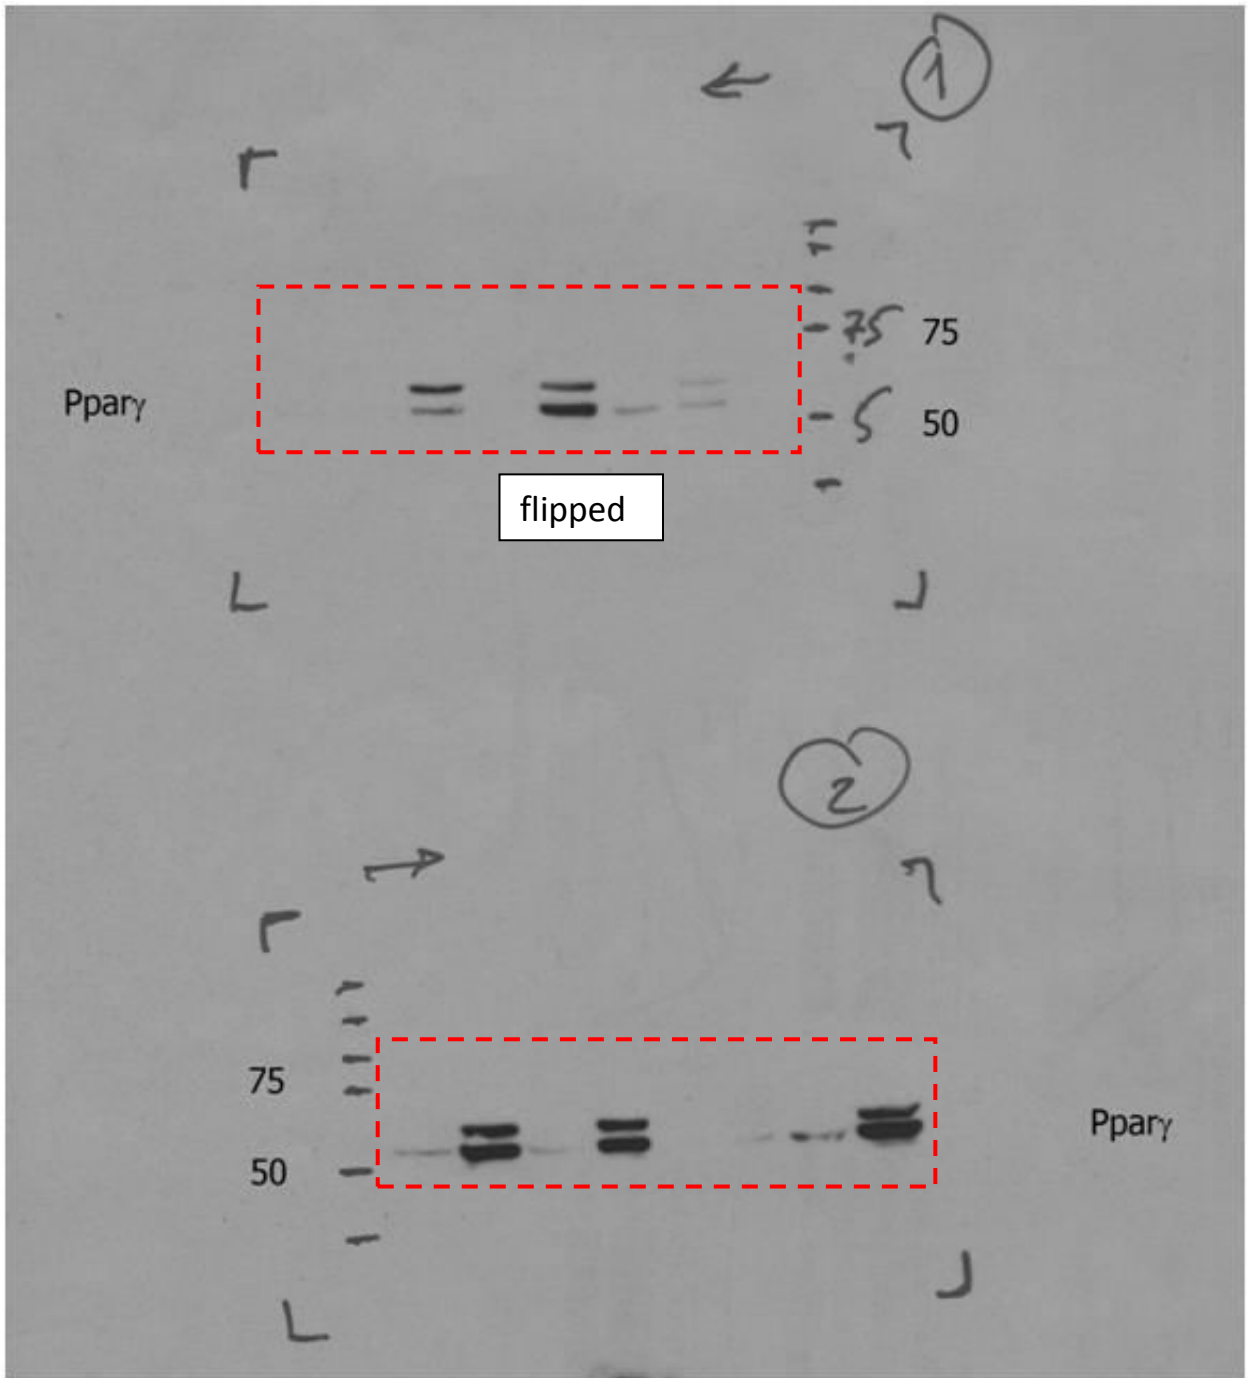

**Figure S3.** Full-length blots for Figure 3A.

phospho Irs1 (Tyr941)

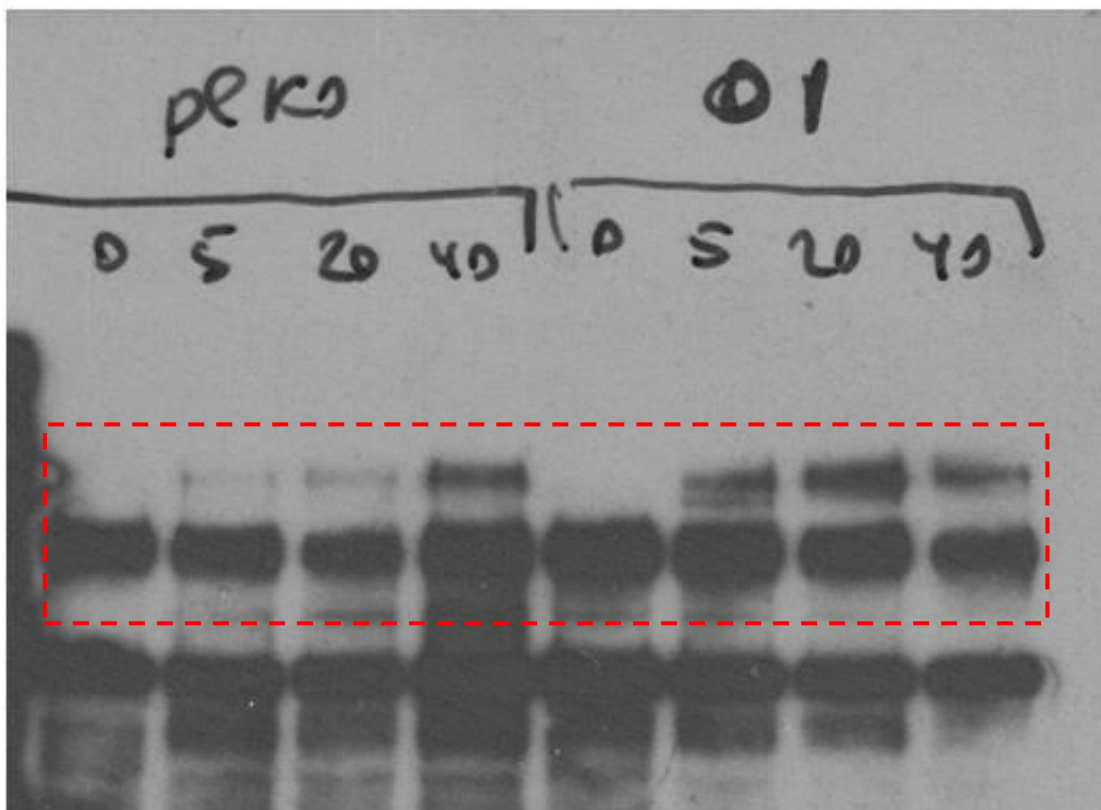

vinculin

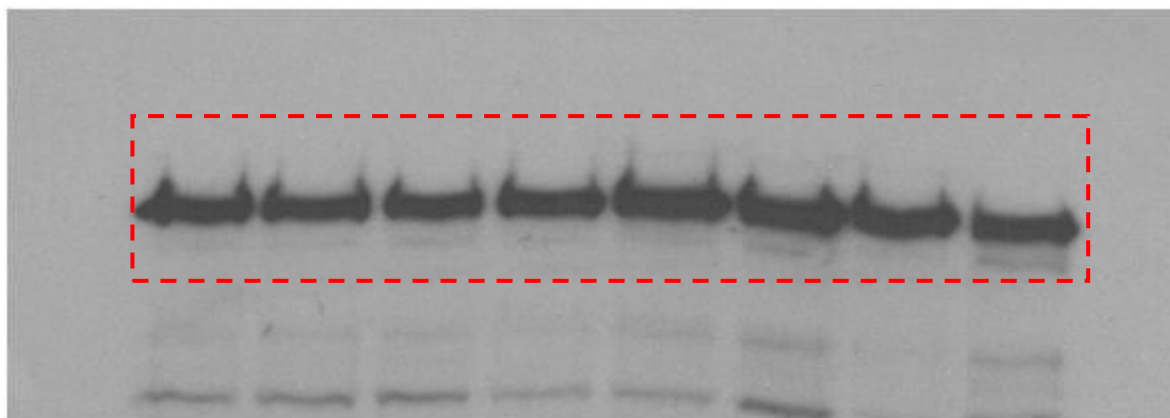

**Figure S4.** Full-length blots for Figure 3B.

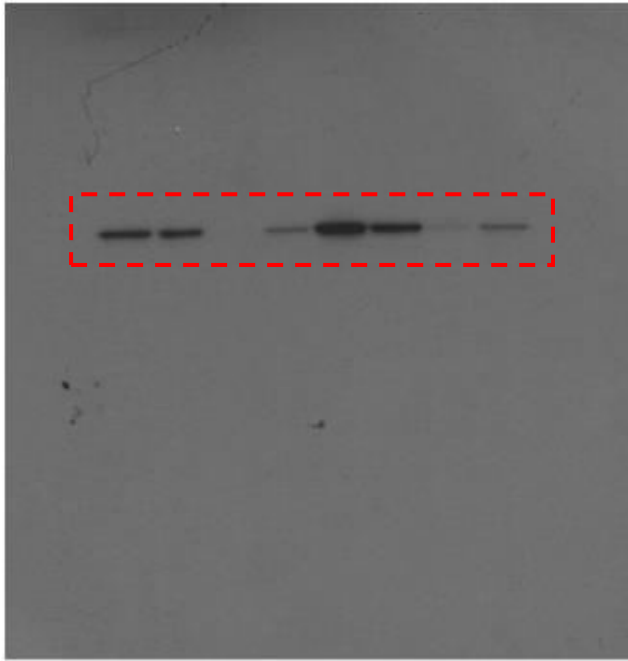

pAkt(thr308)

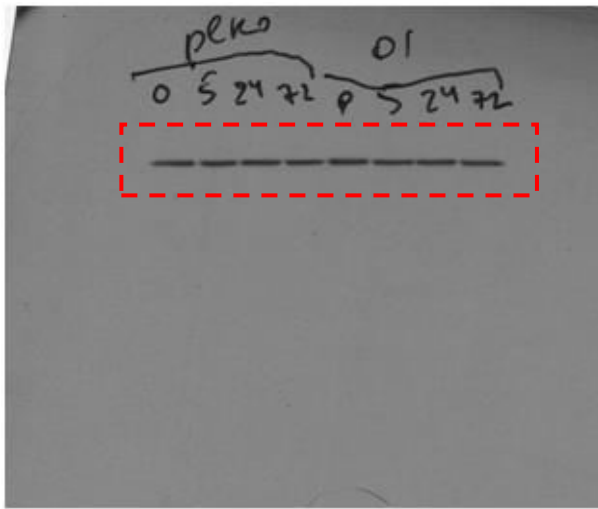

total Akt

**Figure S5.** Full-length blots for Figure 3C.

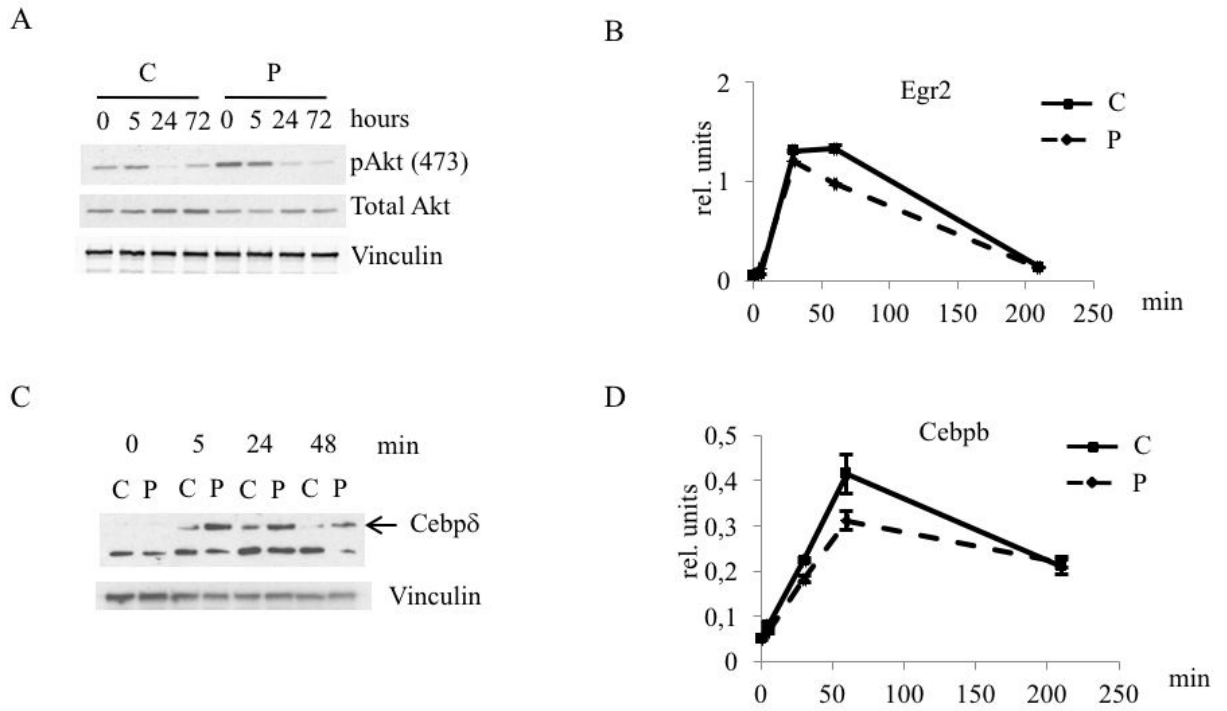

**Figure S6. Expression analysis of genes involved in adipogenic differentiation**

**A.** Immunoblotting analysis of cell extracts from P and C cells at various time points after induction using anti phosphoAkt (Thr308) Ab. Total Akt and Vinculin Abs were used as loading control. **B.** qRT-PCR analysis of *Egr2* expression in P (solid line) and C (dashed line) cells at different time points after induction. Relative gene expression was normalized to *Gapdh* expression. **C.** Immunoblotting of cell extracts from P and C cells at various time points after induction using anti-C/EBPδ Ab. Vinculin Ab was used as loading control. **D.** qRT-PCR analysis of *Cebpb* expression in P (solid line) and C (dashed line) cells at different time points after induction. Gene expression was normalized to *Gapdh* levels.

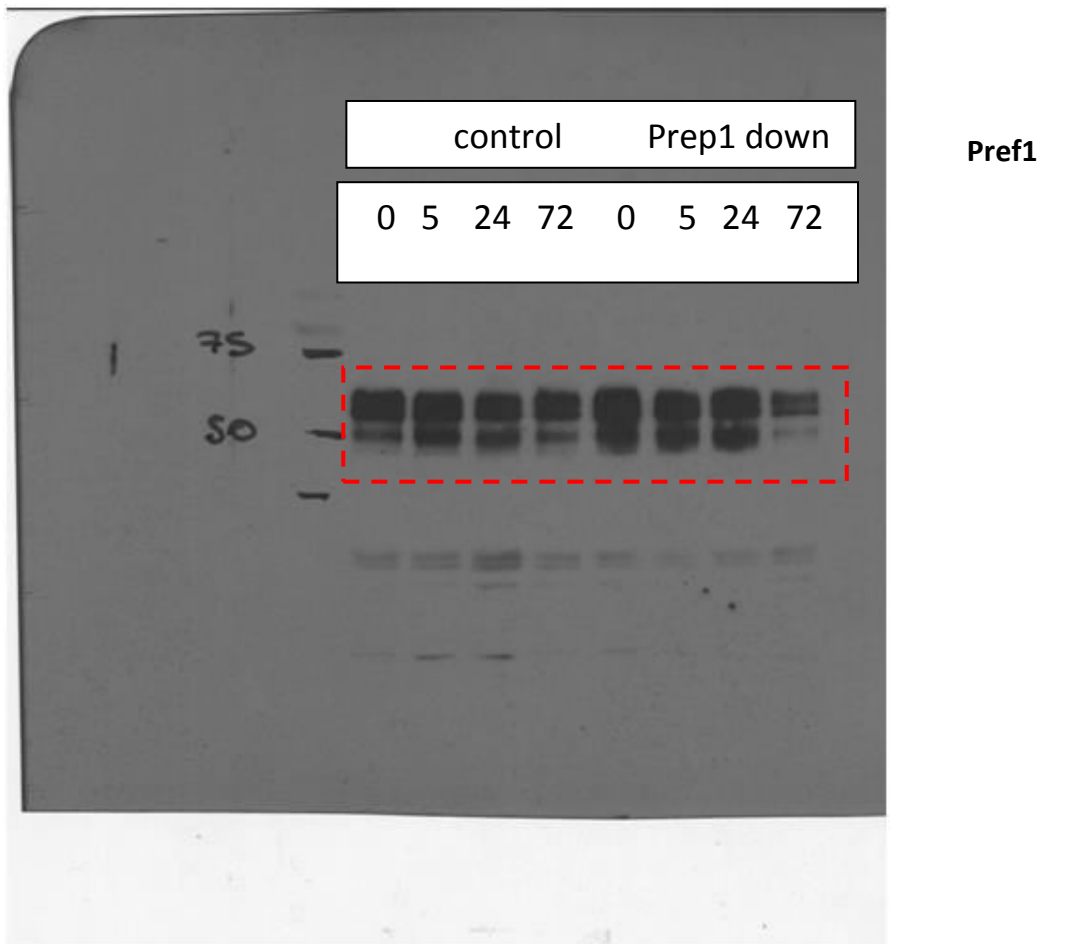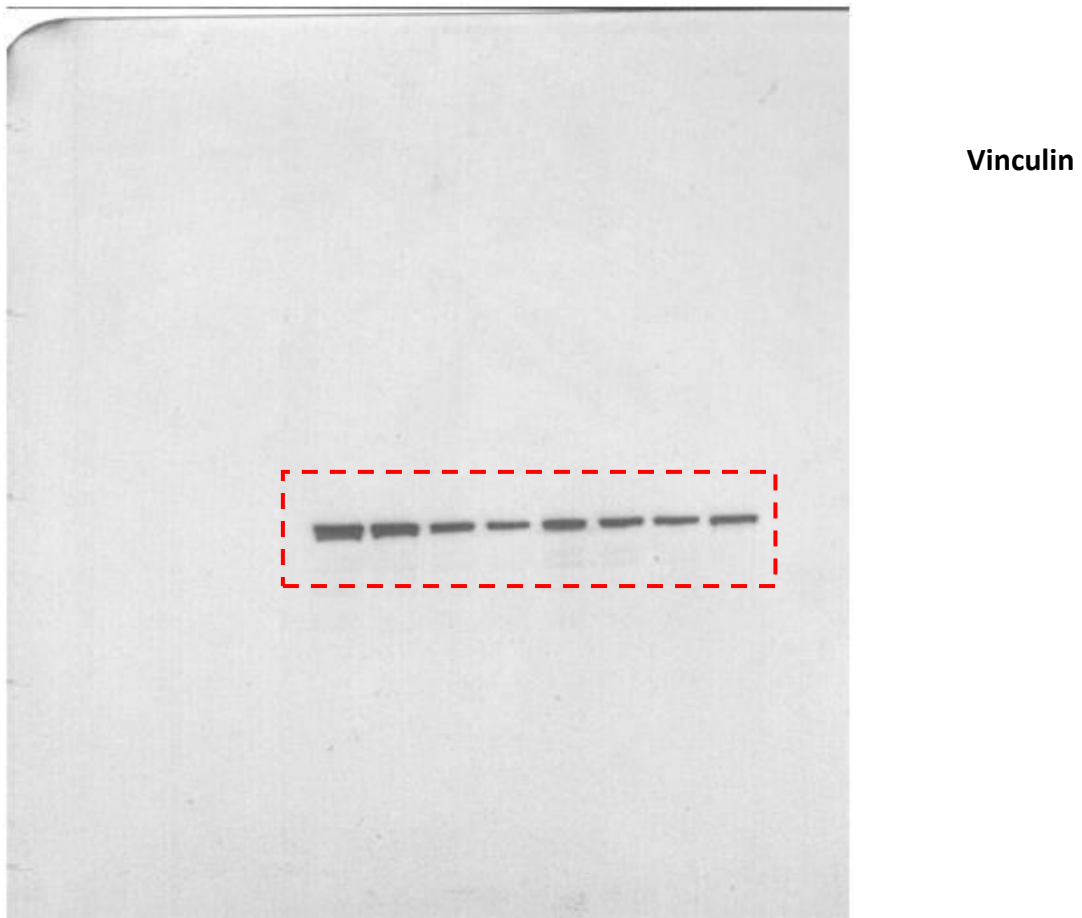

**Figure S7.** Full-length blots for Figure 3E.



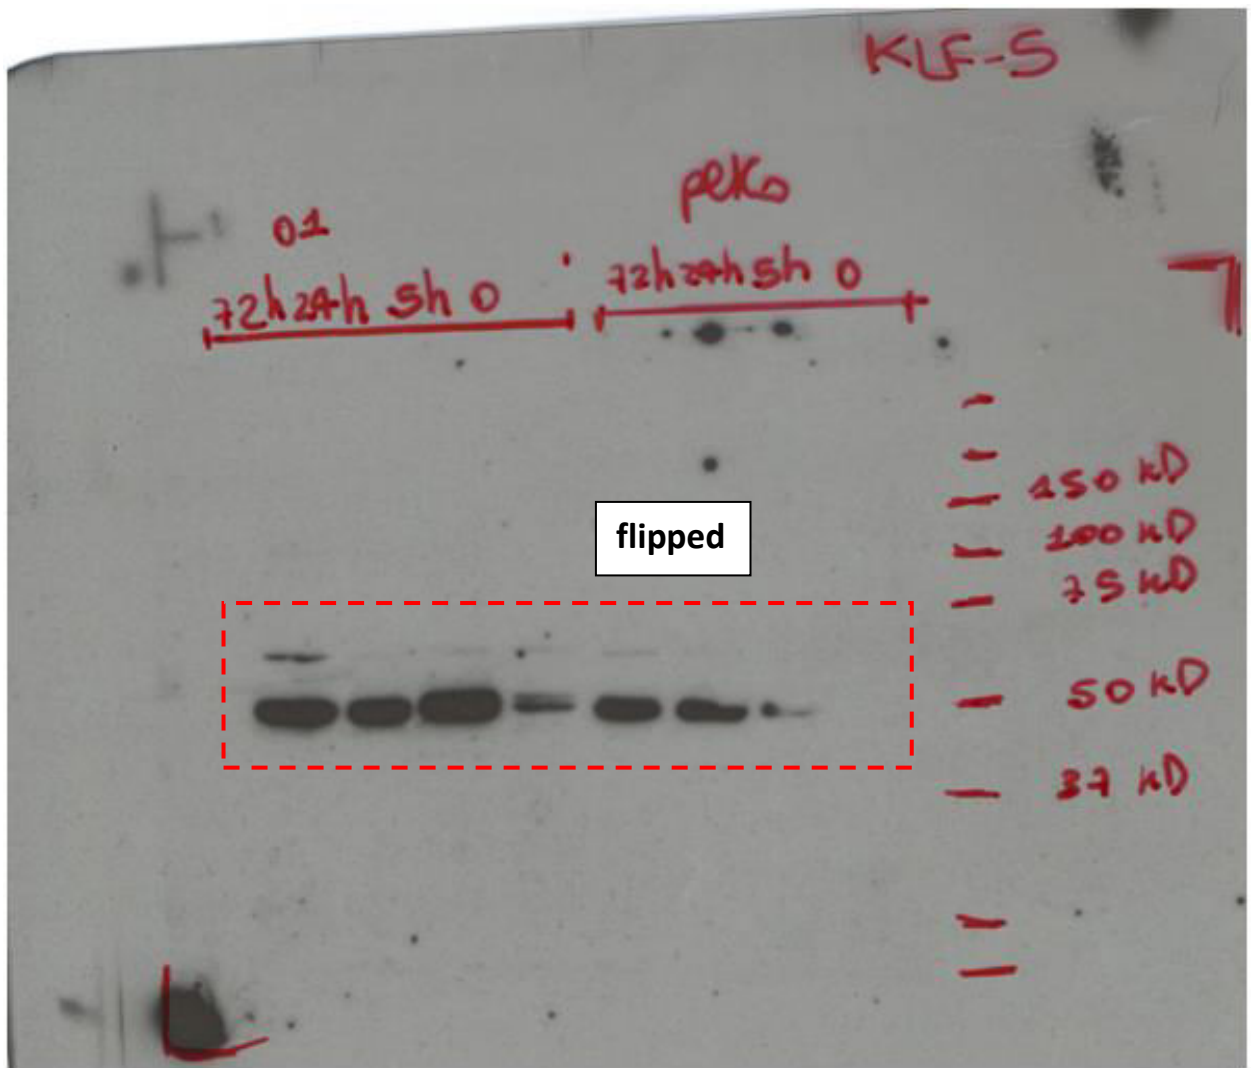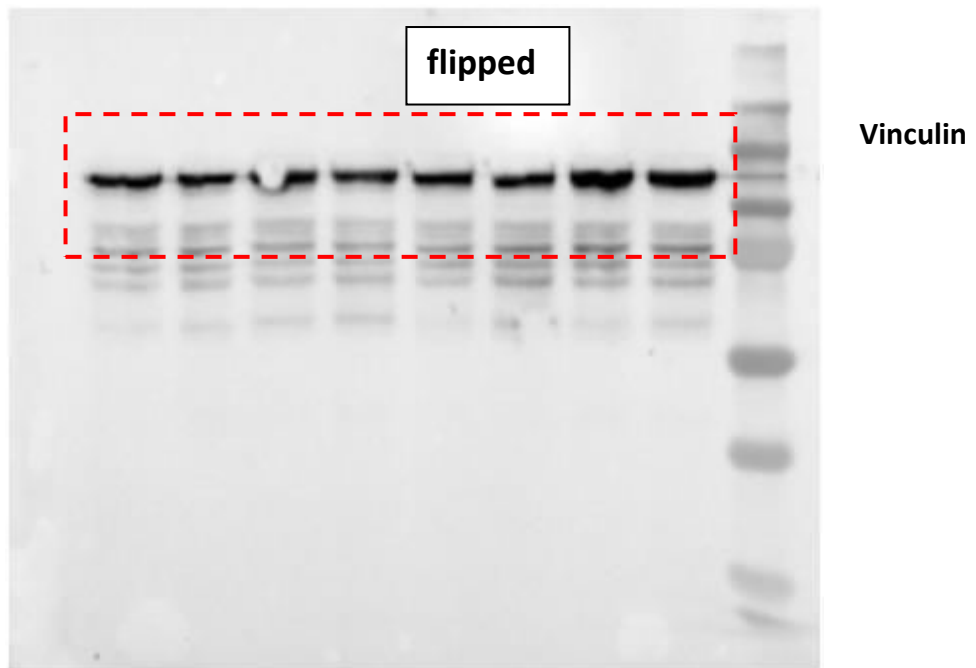

**Figure S8.** Full-length blots for Figure 3H.

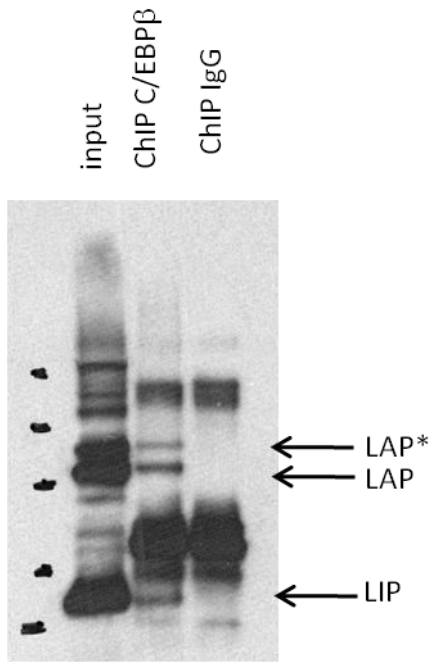

**Figure S9. Western blotting of the immunoprecipitated material (ChIP) using anti- C/EBP $\beta$  Ab.**

Immunoblotting analysis of de-crosslinked input that was used for ChIP in our experiments (input), immunoprecipitated material after ChIP using C/EBP $\beta$  (C19) Ab (ChIP C/EBP $\beta$ ) and rabbit IgG (ChIP IgG). LAP\*, LAP and LIP are different isoforms of C/EBP $\beta$  protein.

A. C/EBP $\beta$  -2 days

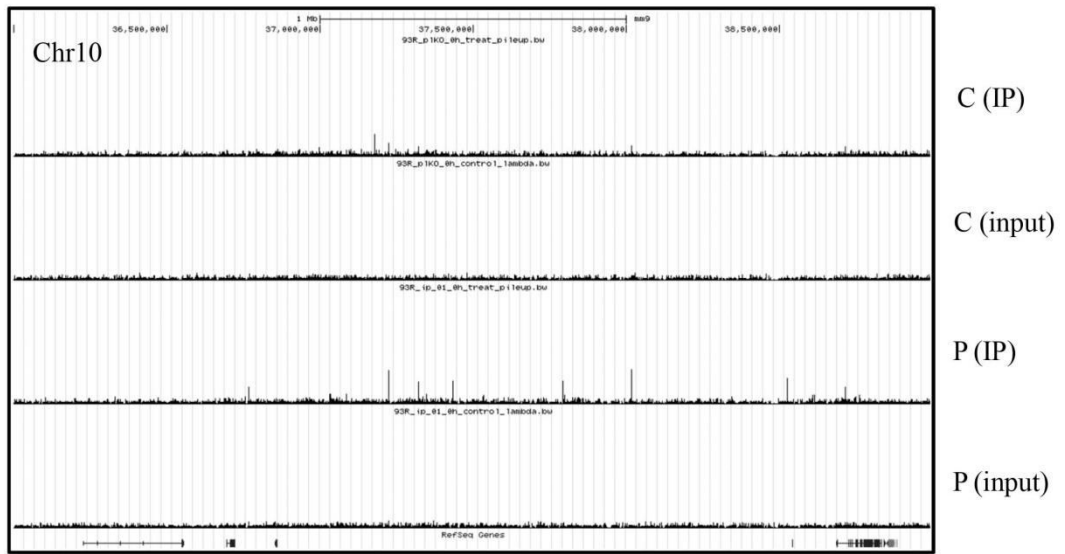

B. C/EBP $\beta$  4 hours

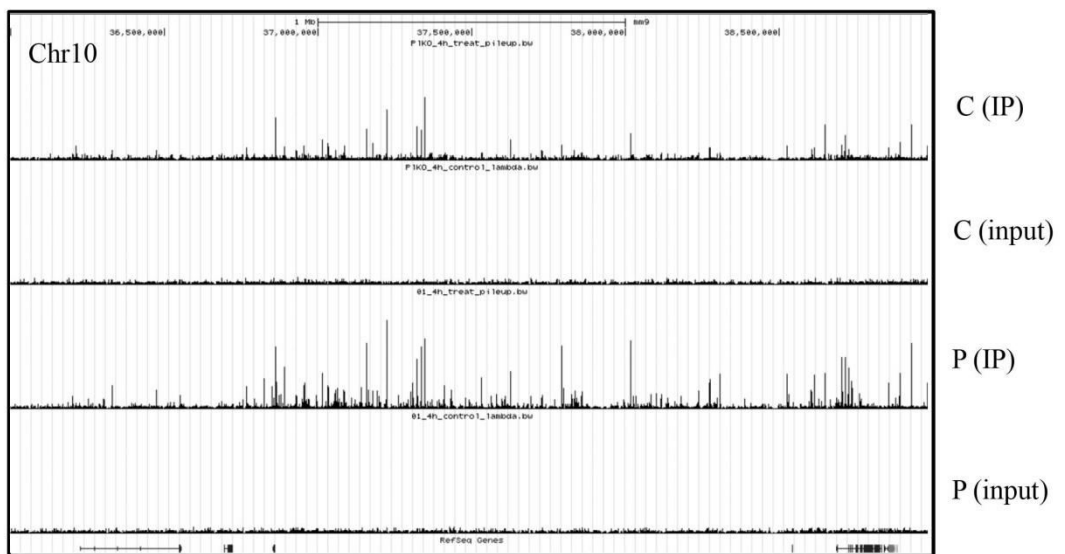

**Figure S10.**

Examples of C/EBP $\beta$  binding peaks in P and C cells before (-2 days) (A) and 4 hours after (B) differentiation induction. IP - immunoprecipitated material, input - non-immunoprecipitated control.

| <b>Gene symbol</b> | <b>Fold change<sup>#</sup></b> | <b>P value</b> | <b>P adj<sup>\$</sup></b> |
|--------------------|--------------------------------|----------------|---------------------------|
| Igfbp5             | 466.50                         | 6.13E-44       | 1.33E-39                  |
| Islr               | 33.87                          | 7.48E-23       | 4.06E-19                  |
| Sorcs1             | 21.56                          | 3.15E-28       | 2.28E-24                  |
| Tusc5              | 19.01                          | 7.60E-08       | 1.13E-05                  |
| Hp                 | 16.95                          | 3.98E-14       | 2.78E-11                  |
| Col15a1            | 15.46                          | 1.90E-17       | 3.43E-14                  |
| Lims2              | 15.43                          | 3.92E-11       | 1.27E-08                  |
| Il31ra             | 14.99                          | 2.16E-12       | 1.09E-09                  |
| Fibin              | 14.67                          | 2.55E-10       | 6.82E-08                  |
| Usp18              | 14.64                          | 4.50E-22       | 1.95E-18                  |
| Nrxn1              | 14.19                          | 4.42E-10       | 1.12E-07                  |
| Psmb8              | 14.11                          | 5.42E-17       | 7.84E-14                  |
| Oas2               | 13.87                          | 8.82E-15       | 7.66E-12                  |
| Ppfia2             | 12.62                          | 9.98E-15       | 8.02E-12                  |
| Actg2              | 12.61                          | 3.67E-15       | 3.32E-12                  |
| Gbp6               | 12.60                          | 7.03E-13       | 4.01E-10                  |
| Psmb9              | 12.32                          | 2.15E-10       | 5.82E-08                  |
| Rgcc               | 11.13                          | 3.11E-11       | 1.02E-08                  |
| Ifi2712a           | 10.96                          | 1.32E-08       | 2.33E-06                  |
| Cyp2f2             | 10.95                          | 4.98E-04       | 2.23E-02                  |
| Aldh1a7            | 10.84                          | 8.50E-08       | 1.25E-05                  |
| Col11a1            | 10.59                          | 1.68E-04       | 9.39E-03                  |
| Gas6               | 10.14                          | 2.78E-20       | 8.61E-17                  |
| Tagln              | 10.11                          | 6.09E-13       | 3.77E-10                  |
| Irf7               | 10.07                          | 1.55E-15       | 1.53E-12                  |
| Tnn                | 9.98                           | 1.83E-16       | 2.20E-13                  |
| Mx2                | 9.86                           | 1.24E-14       | 9.59E-12                  |

|         |      |          |          |
|---------|------|----------|----------|
| Gbp3    | 9.14 | 2.07E-14 | 1.55E-11 |
| Isg15   | 9.05 | 3.68E-17 | 5.70E-14 |
| Notch3  | 8.98 | 2.78E-06 | 2.85E-04 |
| Dhrs3   | 8.83 | 4.30E-09 | 8.48E-07 |
| Fam71e1 | 8.72 | 8.63E-04 | 3.47E-02 |
| Ggt7    | 8.70 | 8.65E-13 | 4.81E-10 |
| Adamts9 | 8.38 | 3.16E-17 | 5.28E-14 |
| My19    | 8.34 | 9.49E-04 | 3.73E-02 |
| Phf11d  | 8.33 | 1.43E-05 | 1.17E-03 |
| Col23a1 | 7.90 | 7.96E-12 | 3.26E-09 |
| Fst     | 7.75 | 3.29E-16 | 3.75E-13 |
| Apod    | 7.66 | 2.16E-08 | 3.61E-06 |
| Nr4a3   | 7.64 | 5.76E-05 | 3.88E-03 |
| Gbp2    | 7.55 | 1.02E-13 | 6.92E-11 |
| Kiss1r  | 7.47 | 5.87E-04 | 2.56E-02 |
| Gm4951  | 7.27 | 1.71E-06 | 1.94E-04 |
| Tap2    | 7.25 | 3.25E-04 | 1.61E-02 |
| Igtp    | 7.16 | 1.10E-11 | 4.26E-09 |
| Oas1a   | 6.99 | 2.77E-11 | 9.39E-09 |
| Prkg1   | 6.88 | 2.86E-06 | 2.91E-04 |
| Ifi44   | 6.84 | 7.53E-12 | 3.14E-09 |
| Bcl11b  | 6.64 | 2.48E-03 | 8.10E-02 |
| Cebpa   | 6.60 | 1.15E-09 | 2.65E-07 |
| Oas1g   | 6.54 | 1.39E-05 | 1.14E-03 |
| Iigp1   | 6.50 | 8.38E-10 | 2.00E-07 |
| Cebpd   | 6.26 | 4.08E-12 | 1.92E-09 |
| Fos     | 6.26 | 1.94E-11 | 7.00E-09 |
| Btg2    | 5.93 | 2.23E-09 | 4.84E-07 |
| Brinp3  | 5.85 | 3.40E-10 | 8.78E-08 |

|          |      |          |          |
|----------|------|----------|----------|
| Tap1     | 5.65 | 9.80E-12 | 3.87E-09 |
| Acta2    | 5.60 | 4.35E-08 | 6.74E-06 |
| Bst2     | 5.56 | 5.20E-12 | 2.30E-09 |
| Tbx2     | 5.54 | 9.25E-05 | 5.82E-03 |
| Slit3    | 5.52 | 2.76E-12 | 1.36E-09 |
| Fosb     | 5.46 | 2.76E-09 | 5.86E-07 |
| Sp100    | 5.38 | 2.50E-07 | 3.36E-05 |
| Rtp4     | 5.38 | 1.31E-10 | 3.80E-08 |
| Irgm2    | 5.37 | 7.64E-09 | 1.43E-06 |
| Spry1    | 5.37 | 2.34E-11 | 8.18E-09 |
| Thbs1    | 5.32 | 1.83E-05 | 1.46E-03 |
| Cmpk2    | 5.28 | 7.54E-08 | 1.13E-05 |
| Ddx60    | 5.26 | 8.58E-08 | 1.26E-05 |
| Lama4    | 5.26 | 4.46E-12 | 2.01E-09 |
| Dmd      | 5.17 | 1.26E-09 | 2.85E-07 |
| Nsg1     | 5.11 | 2.84E-09 | 5.97E-07 |
| Ifi27    | 5.09 | 2.14E-11 | 7.63E-09 |
| Adam23   | 5.08 | 6.18E-12 | 2.63E-09 |
| Nbl1     | 5.03 | 2.12E-08 | 3.57E-06 |
| Rora     | 5.02 | 4.43E-08 | 6.81E-06 |
| Lgals3bp | 5.00 | 4.83E-11 | 1.54E-08 |
| Hoxb8    | 4.97 | 1.91E-03 | 6.64E-02 |
| Oas1b    | 4.97 | 2.01E-06 | 2.16E-04 |
| Lrrc17   | 4.93 | 1.15E-10 | 3.41E-08 |
| Apol9a   | 4.91 | 1.01E-07 | 1.44E-05 |
| Sp110    | 4.91 | 3.64E-08 | 5.80E-06 |
| Clec14a  | 4.89 | 1.71E-09 | 3.80E-07 |
| Parp10   | 4.86 | 6.91E-04 | 2.95E-02 |
| Dact1    | 4.84 | 1.88E-08 | 3.24E-06 |

|          |      |          |          |
|----------|------|----------|----------|
| Grb14    | 4.79 | 1.01E-10 | 3.04E-08 |
| Xaf1     | 4.70 | 1.17E-08 | 2.08E-06 |
| Peg3     | 4.69 | 1.25E-10 | 3.68E-08 |
| Sorbs1   | 4.64 | 2.61E-10 | 6.91E-08 |
| Ddx4     | 4.60 | 4.93E-04 | 2.21E-02 |
| Cfh      | 4.59 | 2.92E-06 | 2.96E-04 |
| Pi15     | 4.58 | 9.61E-08 | 1.39E-05 |
| Fzd4     | 4.52 | 7.66E-09 | 1.43E-06 |
| Dpep1    | 4.41 | 3.14E-08 | 5.16E-06 |
| Cacna1g  | 4.40 | 4.13E-09 | 8.30E-07 |
| Alpl     | 4.33 | 2.48E-03 | 8.10E-02 |
| Oasl2    | 4.31 | 1.79E-08 | 3.10E-06 |
| Apol6    | 4.31 | 3.67E-04 | 1.77E-02 |
| Kcnc2    | 4.27 | 9.88E-04 | 3.85E-02 |
| Cyp1b1   | 4.26 | 7.37E-10 | 1.78E-07 |
| Stat1    | 4.22 | 1.22E-09 | 2.78E-07 |
| Cdo1     | 4.22 | 2.23E-06 | 2.36E-04 |
| Nnmt     | 4.21 | 1.01E-06 | 1.19E-04 |
| Cck      | 4.15 | 2.72E-03 | 8.72E-02 |
| P2rx3    | 4.11 | 2.21E-07 | 3.01E-05 |
| Nod1     | 4.03 | 9.81E-09 | 1.79E-06 |
| Apol10b  | 4.01 | 8.86E-06 | 7.87E-04 |
| Tnfrsf14 | 3.94 | 1.57E-04 | 8.86E-03 |
| Adamts1  | 3.94 | 7.63E-09 | 1.43E-06 |
| Mir143hg | 3.89 | 1.01E-04 | 6.22E-03 |
| Gbp7     | 3.87 | 6.65E-07 | 8.25E-05 |
| Ifit3    | 3.79 | 7.75E-06 | 7.04E-04 |
| Fcgrt    | 3.79 | 7.01E-04 | 2.97E-02 |
| Zbp1     | 3.78 | 4.82E-04 | 2.19E-02 |

|               |      |          |          |
|---------------|------|----------|----------|
| Col12a1       | 3.75 | 1.01E-08 | 1.82E-06 |
| Limch1        | 3.74 | 3.63E-04 | 1.76E-02 |
| Apo19b        | 3.73 | 4.21E-05 | 2.98E-03 |
| H2-Q4         | 3.73 | 6.46E-07 | 8.05E-05 |
| Trim34a       | 3.69 | 8.97E-04 | 3.59E-02 |
| Fbln5         | 3.68 | 1.41E-08 | 2.47E-06 |
| Svep1         | 3.65 | 4.29E-08 | 6.70E-06 |
| Rabl6         | 3.65 | 7.43E-08 | 1.12E-05 |
| Parp14        | 3.63 | 1.01E-07 | 1.44E-05 |
| Ppp1r3b       | 3.63 | 6.94E-04 | 2.95E-02 |
| Bmper         | 3.61 | 1.51E-07 | 2.12E-05 |
| Egr1          | 3.59 | 8.98E-08 | 1.31E-05 |
| Slc10a6       | 3.54 | 8.52E-04 | 3.44E-02 |
| Rab40b        | 3.43 | 7.93E-04 | 3.28E-02 |
| Kazald1       | 3.43 | 5.29E-04 | 2.36E-02 |
| Grpr          | 3.43 | 2.45E-03 | 8.05E-02 |
| C130026I21Rik | 3.42 | 2.30E-05 | 1.76E-03 |
| Rasl12        | 3.40 | 5.71E-05 | 3.86E-03 |
| Vldlr         | 3.39 | 3.97E-07 | 5.07E-05 |
| Ror2          | 3.38 | 6.26E-05 | 4.15E-03 |
| Gm10638       | 3.37 | 3.18E-03 | 9.87E-02 |
| Arhgap33      | 3.36 | 6.11E-04 | 2.65E-02 |
| Gab2          | 3.34 | 1.57E-05 | 1.27E-03 |
| Lpl           | 3.34 | 1.90E-07 | 2.66E-05 |
| Atoh8         | 3.33 | 1.59E-06 | 1.82E-04 |
| Sh2d3c        | 3.31 | 1.06E-04 | 6.50E-03 |
| Fat4          | 3.30 | 3.51E-07 | 4.56E-05 |
| Ifi47         | 3.28 | 2.20E-04 | 1.17E-02 |
| Lifr          | 3.27 | 3.60E-07 | 4.64E-05 |



|           |      |          |          |
|-----------|------|----------|----------|
| Cdkn2d    | 3.27 | 2.35E-03 | 7.77E-02 |
| Hoxc13    | 3.26 | 4.77E-05 | 3.31E-03 |
| Stat2     | 3.26 | 1.09E-06 | 1.28E-04 |
| Ksr1      | 3.26 | 2.03E-06 | 2.17E-04 |
| Ednra     | 3.23 | 3.32E-07 | 4.34E-05 |
| Slc43a1   | 3.22 | 2.65E-04 | 1.37E-02 |
| Kifc2     | 3.19 | 2.66E-03 | 8.56E-02 |
| Boc       | 3.19 | 1.21E-06 | 1.40E-04 |
| Nlrc5     | 3.18 | 1.30E-04 | 7.63E-03 |
| Gpc4      | 3.15 | 4.99E-07 | 6.30E-05 |
| Ifi35     | 3.13 | 4.39E-06 | 4.23E-04 |
| Il17ra    | 3.13 | 3.20E-03 | 9.88E-02 |
| Acss2     | 3.11 | 7.05E-06 | 6.45E-04 |
| Mxd1      | 3.10 | 2.02E-05 | 1.59E-03 |
| Ier2      | 3.06 | 8.79E-04 | 3.53E-02 |
| Grem2     | 3.04 | 3.41E-06 | 3.38E-04 |
| Zfp503    | 3.04 | 2.17E-04 | 1.16E-02 |
| Zeb2      | 3.02 | 3.40E-06 | 3.38E-04 |
| H2-T10    | 3.02 | 2.86E-05 | 2.09E-03 |
| Hs6st2    | 3.02 | 6.68E-06 | 6.17E-04 |
| Egr2      | 3.02 | 5.16E-05 | 3.54E-03 |
| P4ha3     | 3.01 | 2.91E-05 | 2.12E-03 |
| Nr4a1     | 3.01 | 4.59E-06 | 4.36E-04 |
| Irf9      | 3.00 | 3.45E-06 | 3.40E-04 |
| Adcyap1r1 | 3.00 | 1.93E-04 | 1.07E-02 |
| S1pr3     | 2.99 | 2.74E-06 | 2.82E-04 |
| Trim21    | 2.96 | 1.19E-04 | 7.15E-03 |
| Usp2      | 2.96 | 5.43E-05 | 3.71E-03 |
| Zfp36     | 2.94 | 8.61E-06 | 7.72E-04 |

|               |      |          |          |
|---------------|------|----------|----------|
| Vstm2a        | 2.93 | 4.37E-05 | 3.06E-03 |
| Pdgfrb        | 2.92 | 2.75E-03 | 8.81E-02 |
| Pmm1          | 2.92 | 1.03E-05 | 8.96E-04 |
| Gm7609        | 2.91 | 1.32E-04 | 7.69E-03 |
| Arrdc4        | 2.91 | 1.33E-05 | 1.10E-03 |
| Ptn           | 2.90 | 5.38E-06 | 5.05E-04 |
| Tle2          | 2.89 | 2.59E-05 | 1.93E-03 |
| Vdr           | 2.88 | 6.64E-06 | 6.16E-04 |
| Serpine2      | 2.87 | 1.34E-05 | 1.11E-03 |
| H19           | 2.87 | 1.17E-04 | 7.07E-03 |
| 5430417L22Rik | 2.85 | 3.55E-05 | 2.55E-03 |
| Adamts2       | 2.85 | 1.80E-05 | 1.43E-03 |
| Pnp2          | 2.75 | 8.03E-04 | 3.29E-02 |
| Emc9          | 2.74 | 1.78E-03 | 6.21E-02 |
| Thbd          | 2.74 | 2.81E-04 | 1.42E-02 |
| Zeb2os        | 2.73 | 1.21E-03 | 4.55E-02 |
| Trp63         | 2.73 | 1.52E-04 | 8.59E-03 |
| Gdpd2         | 2.72 | 1.01E-03 | 3.91E-02 |
| Rnf149        | 2.71 | 4.90E-05 | 3.39E-03 |
| Ifit1         | 2.70 | 2.19E-05 | 1.71E-03 |
| Pde1a         | 2.68 | 5.29E-04 | 2.36E-02 |
| Parp9         | 2.68 | 2.41E-05 | 1.83E-03 |
| Ebf1          | 2.67 | 2.13E-05 | 1.67E-03 |
| Rnf144a       | 2.66 | 1.40E-04 | 8.03E-03 |
| C1s           | 2.65 | 8.22E-05 | 5.27E-03 |
| Pid1          | 2.63 | 1.97E-04 | 1.08E-02 |
| Smim1         | 2.63 | 2.78E-04 | 1.41E-02 |
| Ehd3          | 2.61 | 1.15E-04 | 6.96E-03 |
| Fzd7          | 2.60 | 1.42E-04 | 8.14E-03 |

|               |      |          |          |
|---------------|------|----------|----------|
| H2-DMa        | 2.60 | 1.62E-03 | 5.75E-02 |
| Nr2f1         | 2.60 | 9.82E-05 | 6.14E-03 |
| Adamts12      | 2.59 | 7.67E-05 | 4.98E-03 |
| Pdzrn3        | 2.59 | 9.07E-05 | 5.72E-03 |
| Gpatch11      | 2.59 | 1.95E-04 | 1.08E-02 |
| Polr3gl       | 2.58 | 7.23E-04 | 3.03E-02 |
| Zcwpw1        | 2.57 | 2.05E-04 | 1.11E-02 |
| Cish          | 2.57 | 9.50E-04 | 3.73E-02 |
| Rtn2          | 2.56 | 2.92E-03 | 9.24E-02 |
| Reck          | 2.56 | 2.93E-04 | 1.48E-02 |
| Aspn          | 2.56 | 2.24E-03 | 7.53E-02 |
| Egfr          | 2.55 | 4.35E-05 | 3.06E-03 |
| Izumo4        | 2.55 | 2.34E-03 | 7.76E-02 |
| Setbp1        | 2.54 | 5.55E-05 | 3.76E-03 |
| Il1r1         | 2.52 | 5.80E-05 | 3.88E-03 |
| BC018242      | 2.52 | 7.00E-04 | 2.97E-02 |
| Prkce         | 2.51 | 2.20E-04 | 1.17E-02 |
| Dhx58         | 2.51 | 3.18E-04 | 1.59E-02 |
| Map3k6        | 2.50 | 3.27E-04 | 1.62E-02 |
| Ppap2a        | 2.49 | 5.54E-04 | 2.44E-02 |
| Tpcn2         | 2.48 | 2.76E-04 | 1.41E-02 |
| Cdkn2c        | 2.47 | 1.45E-04 | 8.29E-03 |
| Syt11         | 2.45 | 5.29E-04 | 2.36E-02 |
| 4933426M11Rik | 2.45 | 1.87E-04 | 1.04E-02 |
| Tll1          | 2.42 | 2.68E-04 | 1.38E-02 |
| Ifitm3        | 2.41 | 8.23E-05 | 5.27E-03 |
| Mgst1         | 2.41 | 2.17E-04 | 1.16E-02 |
| Ppp1r3c       | 2.41 | 1.23E-03 | 4.62E-02 |
| Pappa         | 2.39 | 1.28E-04 | 7.52E-03 |

|           |      |          |          |
|-----------|------|----------|----------|
| Helz2     | 2.39 | 2.47E-04 | 1.29E-02 |
| S1pr1     | 2.36 | 2.11E-04 | 1.14E-02 |
| Snai1     | 2.36 | 5.69E-04 | 2.49E-02 |
| Fstl1     | 2.35 | 1.96E-04 | 1.08E-02 |
| Col6a2    | 2.35 | 6.72E-04 | 2.87E-02 |
| Ppp1r15a  | 2.35 | 2.12E-03 | 7.24E-02 |
| Osmr      | 2.35 | 2.14E-03 | 7.28E-02 |
| Stk40     | 2.33 | 1.24E-03 | 4.62E-02 |
| Nfia      | 2.32 | 2.33E-04 | 1.24E-02 |
| Olfml2b   | 2.31 | 4.11E-04 | 1.94E-02 |
| LOC547349 | 2.31 | 9.16E-04 | 3.65E-02 |
| Col6a1    | 2.29 | 8.19E-04 | 3.33E-02 |
| Fgf10     | 2.28 | 6.63E-04 | 2.84E-02 |
| Il6st     | 2.28 | 2.42E-04 | 1.27E-02 |
| Trim12c   | 2.28 | 7.06E-04 | 2.98E-02 |
| Adc       | 2.26 | 2.22E-03 | 7.51E-02 |
| Stat3     | 2.25 | 4.72E-04 | 2.15E-02 |
| Lamc1     | 2.24 | 7.11E-04 | 2.99E-02 |
| Pde4b     | 2.23 | 3.74E-04 | 1.80E-02 |
| Per1      | 2.23 | 1.51E-03 | 5.41E-02 |
| Kif26b    | 2.22 | 1.07E-03 | 4.10E-02 |
| Foxs1     | 2.21 | 1.59E-03 | 5.63E-02 |
| Agrn      | 2.21 | 1.38E-03 | 5.03E-02 |
| Arhgef25  | 2.20 | 7.65E-04 | 3.18E-02 |
| Id3       | 2.20 | 3.05E-03 | 9.58E-02 |
| Sdc1      | 2.19 | 1.31E-03 | 4.85E-02 |
| Ptgfr     | 2.19 | 4.58E-04 | 2.10E-02 |
| Tob2      | 2.18 | 1.59E-03 | 5.63E-02 |
| Mnda      | 2.18 | 2.59E-03 | 8.38E-02 |

|          |      |          |          |
|----------|------|----------|----------|
| H2-L     | 2.16 | 2.03E-03 | 6.99E-02 |
| Gda      | 2.15 | 3.06E-03 | 9.58E-02 |
| C1ra     | 2.14 | 1.29E-03 | 4.79E-02 |
| Tef      | 2.14 | 1.76E-03 | 6.14E-02 |
| Cebpb    | 2.14 | 1.57E-03 | 5.57E-02 |
| Sash1    | 2.13 | 1.72E-03 | 6.05E-02 |
| Ppap2b   | 2.13 | 1.01E-03 | 3.90E-02 |
| Dram1    | 2.12 | 1.38E-03 | 5.03E-02 |
| Dtx3l    | 2.12 | 1.19E-03 | 4.50E-02 |
| Dlc1     | 2.11 | 1.11E-03 | 4.23E-02 |
| Arhgap20 | 2.10 | 8.84E-04 | 3.55E-02 |
| Nfkbiz   | 2.08 | 2.24E-03 | 7.54E-02 |
| Mmp19    | 2.05 | 2.30E-03 | 7.67E-02 |
| Lgals9   | 2.03 | 2.82E-03 | 8.97E-02 |
| Sepp1    | 2.02 | 9.90E-04 | 3.85E-02 |
| Gcnt2    | 1.96 | 3.24E-03 | 9.98E-02 |
| Ddx58    | 1.96 | 1.78E-03 | 6.22E-02 |
| Arhgef5  | 0.49 | 2.29E-03 | 7.66E-02 |
| Ier3     | 0.49 | 3.22E-03 | 9.93E-02 |
| Adamts7  | 0.49 | 1.43E-03 | 5.18E-02 |
| Dock9    | 0.48 | 2.22E-03 | 7.51E-02 |
| Erccl    | 0.48 | 1.44E-03 | 5.18E-02 |
| Adam8    | 0.47 | 1.26E-03 | 4.71E-02 |
| Gprc5a   | 0.47 | 2.03E-03 | 6.99E-02 |
| Apcdd1   | 0.46 | 6.11E-04 | 2.65E-02 |
| Ccbe1    | 0.45 | 1.25E-03 | 4.66E-02 |
| Rbpj     | 0.44 | 9.48E-04 | 3.73E-02 |
| Etv4     | 0.44 | 4.65E-04 | 2.13E-02 |
| Jup      | 0.44 | 2.80E-04 | 1.42E-02 |

|               |      |          |          |
|---------------|------|----------|----------|
| Rbp1          | 0.44 | 6.29E-04 | 2.71E-02 |
| Angptl2       | 0.44 | 1.36E-04 | 7.82E-03 |
| Ttc26         | 0.43 | 2.33E-03 | 7.74E-02 |
| Clcn5         | 0.43 | 7.74E-04 | 3.22E-02 |
| Pdp1          | 0.42 | 1.46E-03 | 5.24E-02 |
| Nfatc2        | 0.42 | 3.18E-03 | 9.87E-02 |
| Syne2         | 0.42 | 1.33E-04 | 7.69E-03 |
| Ccrn4l        | 0.41 | 4.24E-04 | 1.99E-02 |
| Pard6b        | 0.41 | 1.21E-03 | 4.56E-02 |
| Pcgf5         | 0.41 | 9.30E-04 | 3.69E-02 |
| Dpt           | 0.41 | 2.52E-04 | 1.31E-02 |
| Rcor2         | 0.40 | 1.01E-04 | 6.26E-03 |
| Pik3cb        | 0.40 | 3.25E-04 | 1.61E-02 |
| Atp6v0a4      | 0.40 | 2.82E-03 | 8.97E-02 |
| Erc2          | 0.40 | 3.20E-03 | 9.88E-02 |
| Slc25a13      | 0.40 | 2.72E-04 | 1.40E-02 |
| Dusp4         | 0.40 | 6.66E-05 | 4.40E-03 |
| Ptpre         | 0.39 | 9.91E-04 | 3.85E-02 |
| Lpar2         | 0.39 | 1.08E-03 | 4.15E-02 |
| Mpp6          | 0.39 | 2.46E-03 | 8.06E-02 |
| Ii17rd        | 0.39 | 1.64E-04 | 9.20E-03 |
| Olfm1         | 0.38 | 2.29E-03 | 7.66E-02 |
| 5730507C01Rik | 0.38 | 2.18E-03 | 7.39E-02 |
| 5430435G22Rik | 0.38 | 1.60E-04 | 9.00E-03 |
| Fam185a       | 0.38 | 6.29E-04 | 2.71E-02 |
| Nfatc1        | 0.38 | 5.87E-05 | 3.92E-03 |
| Tgfbr2        | 0.38 | 2.28E-05 | 1.75E-03 |
| Lipg          | 0.37 | 2.81E-03 | 8.97E-02 |
| Elmo1         | 0.37 | 1.73E-03 | 6.09E-02 |

|               |      |          |          |
|---------------|------|----------|----------|
| Serpinb9b     | 0.37 | 3.82E-04 | 1.82E-02 |
| Loxl4         | 0.36 | 1.27E-05 | 1.06E-03 |
| Plat          | 0.36 | 2.42E-05 | 1.83E-03 |
| Afap112       | 0.36 | 4.38E-04 | 2.03E-02 |
| Igfbp4        | 0.36 | 1.85E-06 | 2.03E-04 |
| Vav3          | 0.36 | 9.98E-05 | 6.19E-03 |
| Pdpm          | 0.35 | 2.99E-03 | 9.42E-02 |
| Ralgps2       | 0.35 | 1.32E-04 | 7.69E-03 |
| Csf1r         | 0.35 | 1.32E-03 | 4.86E-02 |
| Enpp5         | 0.35 | 4.46E-04 | 2.05E-02 |
| Ptpn6         | 0.35 | 4.31E-04 | 2.01E-02 |
| Cgref1        | 0.34 | 9.13E-04 | 3.64E-02 |
| Adamts14      | 0.34 | 1.97E-06 | 2.13E-04 |
| Chml          | 0.34 | 1.08E-04 | 6.61E-03 |
| Met           | 0.34 | 5.33E-05 | 3.65E-03 |
| Tanc2         | 0.33 | 9.63E-06 | 8.46E-04 |
| 1700088E04Rik | 0.33 | 2.09E-03 | 7.14E-02 |
| Parp16        | 0.33 | 3.06E-03 | 9.58E-02 |
| Gas7          | 0.33 | 3.03E-06 | 3.06E-04 |
| Dyrk3         | 0.32 | 1.07E-05 | 9.21E-04 |
| Pik3r5        | 0.32 | 1.67E-05 | 1.34E-03 |
| Dock11        | 0.32 | 8.01E-04 | 3.29E-02 |
| Wnt6          | 0.31 | 1.18E-05 | 1.00E-03 |
| Strbp         | 0.31 | 1.33E-05 | 1.10E-03 |
| Cdkl2         | 0.31 | 3.24E-04 | 1.61E-02 |
| Prtg          | 0.30 | 4.77E-05 | 3.31E-03 |
| Arhgap22      | 0.30 | 3.06E-07 | 4.05E-05 |
| Timp3         | 0.30 | 1.66E-06 | 1.89E-04 |
| Ndrp2         | 0.29 | 1.77E-03 | 6.19E-02 |

|           |      |          |          |
|-----------|------|----------|----------|
| Fmn1      | 0.29 | 2.11E-04 | 1.14E-02 |
| Lphn3     | 0.29 | 2.89E-03 | 9.17E-02 |
| Sgms2     | 0.29 | 7.70E-06 | 7.02E-04 |
| Ctnnal1   | 0.28 | 1.97E-07 | 2.73E-05 |
| Hspa4l    | 0.28 | 4.84E-07 | 6.14E-05 |
| Prl2c4    | 0.27 | 1.33E-04 | 7.69E-03 |
| Prl2c3    | 0.27 | 1.33E-04 | 7.69E-03 |
| Flrt3     | 0.27 | 2.43E-06 | 2.54E-04 |
| Prl2c2    | 0.26 | 4.79E-04 | 2.18E-02 |
| Slc22a23  | 0.26 | 2.09E-07 | 2.87E-05 |
| Mmp3      | 0.26 | 2.89E-07 | 3.85E-05 |
| Lgals7    | 0.26 | 2.66E-03 | 8.56E-02 |
| Bnc1      | 0.25 | 4.14E-08 | 6.51E-06 |
| Pctp      | 0.24 | 2.53E-04 | 1.32E-02 |
| Spon2     | 0.24 | 2.94E-09 | 6.13E-07 |
| Stx3      | 0.24 | 3.34E-06 | 3.34E-04 |
| Cytip     | 0.23 | 1.99E-06 | 2.15E-04 |
| Ccdc41os1 | 0.22 | 1.14E-03 | 4.35E-02 |
| Ngef      | 0.22 | 4.32E-04 | 2.01E-02 |
| Acsbg1    | 0.22 | 3.44E-09 | 6.98E-07 |
| St6gal1   | 0.22 | 4.19E-09 | 8.34E-07 |
| Rhou      | 0.22 | 5.11E-10 | 1.27E-07 |
| Macc1     | 0.22 | 1.36E-03 | 4.99E-02 |
| Pkp3      | 0.22 | 2.72E-05 | 2.00E-03 |
| Klk10     | 0.21 | 4.90E-04 | 2.21E-02 |
| Lrrc8d    | 0.21 | 2.67E-09 | 5.73E-07 |
| Atp8b4    | 0.21 | 2.63E-06 | 2.73E-04 |
| Gm12603   | 0.20 | 1.24E-04 | 7.32E-03 |
| Nipal1    | 0.20 | 8.54E-04 | 3.45E-02 |



|         |      |          |          |
|---------|------|----------|----------|
| Snora44 | 0.20 | 4.41E-04 | 2.05E-02 |
| Trpv4   | 0.20 | 4.21E-06 | 4.11E-04 |
| Ccl17   | 0.20 | 8.13E-04 | 3.32E-02 |
| Sema3f  | 0.19 | 6.59E-11 | 2.07E-08 |
| Prrg4   | 0.19 | 1.98E-07 | 2.73E-05 |
| Lamb3   | 0.19 | 1.48E-04 | 8.42E-03 |
| Il34    | 0.19 | 6.19E-06 | 5.76E-04 |
| Cd300lb | 0.18 | 5.87E-06 | 5.49E-04 |
| Chrb1   | 0.18 | 1.11E-05 | 9.56E-04 |
| Pdgfb   | 0.18 | 2.30E-06 | 2.42E-04 |
| Nlrc3   | 0.18 | 9.34E-06 | 8.27E-04 |
| Il18rap | 0.18 | 1.50E-11 | 5.72E-09 |
| Ntrk3   | 0.18 | 1.79E-06 | 2.01E-04 |
| Etl4    | 0.18 | 2.09E-08 | 3.54E-06 |
| Fyb     | 0.17 | 2.64E-03 | 8.52E-02 |
| Ptpnb   | 0.17 | 1.32E-03 | 4.86E-02 |
| Sema7a  | 0.17 | 1.70E-11 | 6.35E-09 |
| Clec1a  | 0.17 | 1.18E-03 | 4.48E-02 |
| Itga3   | 0.17 | 6.54E-13 | 3.91E-10 |
| Creb5   | 0.16 | 1.08E-04 | 6.60E-03 |
| Plac1   | 0.16 | 1.47E-04 | 8.40E-03 |
| Gdpd5   | 0.16 | 2.08E-10 | 5.79E-08 |
| Card10  | 0.16 | 4.27E-12 | 1.97E-09 |
| Accsl   | 0.16 | 4.09E-05 | 2.90E-03 |
| Ctsw    | 0.16 | 2.37E-04 | 1.25E-02 |
| Eml5    | 0.15 | 9.93E-13 | 5.35E-10 |
| Hcn4    | 0.15 | 5.59E-04 | 2.45E-02 |
| Sema5a  | 0.15 | 1.07E-13 | 7.04E-11 |
| Rap1gap | 0.15 | 2.51E-07 | 3.37E-05 |

|          |      |          |          |
|----------|------|----------|----------|
| Cln3     | 0.14 | 4.88E-04 | 2.21E-02 |
| Atg9b    | 0.14 | 1.05E-05 | 9.09E-04 |
| Xpnpep2  | 0.13 | 1.64E-12 | 8.46E-10 |
| Dock8    | 0.13 | 3.34E-08 | 5.41E-06 |
| Myh1     | 0.12 | 3.53E-04 | 1.72E-02 |
| Cd33     | 0.12 | 2.39E-05 | 1.82E-03 |
| Zfp709   | 0.12 | 7.46E-04 | 3.12E-02 |
| S100a16  | 0.12 | 5.60E-09 | 1.07E-06 |
| Ano1     | 0.12 | 9.48E-09 | 1.74E-06 |
| Sorcs2   | 0.12 | 6.32E-17 | 8.57E-14 |
| Adcy7    | 0.12 | 1.67E-16 | 2.14E-13 |
| Htra1    | 0.12 | 6.97E-11 | 2.16E-08 |
| Cgn      | 0.12 | 3.10E-12 | 1.50E-09 |
| Pla2g7   | 0.12 | 1.09E-15 | 1.17E-12 |
| Gna14    | 0.11 | 5.45E-04 | 2.40E-02 |
| AU021092 | 0.11 | 3.03E-11 | 1.01E-08 |
| Itgb7    | 0.11 | 1.14E-15 | 1.17E-12 |
| Pkp1     | 0.11 | 8.12E-05 | 5.23E-03 |
| Tenm4    | 0.11 | 3.66E-19 | 7.94E-16 |
| Glrp1    | 0.10 | 2.29E-03 | 7.66E-02 |
| Phex     | 0.10 | 1.77E-10 | 4.99E-08 |
| Krt8     | 0.08 | 9.82E-07 | 1.16E-04 |
| Cyth4    | 0.08 | 1.01E-03 | 3.90E-02 |
| Podxl    | 0.07 | 1.13E-04 | 6.86E-03 |
| Ngfr     | 0.07 | 1.28E-05 | 1.07E-03 |
| Dynap    | 0.06 | 3.70E-14 | 2.68E-11 |
| Inpp4b   | 0.05 | 4.42E-05 | 3.08E-03 |
| Lgr6     | 0.04 | 4.71E-20 | 1.28E-16 |
| Blnk     | 0.04 | 3.34E-06 | 3.34E-04 |

|         |      |          |          |
|---------|------|----------|----------|
| Akr1c18 | 0.04 | 1.48E-19 | 3.57E-16 |
| Slc14a1 | 0.03 | 9.97E-11 | 3.04E-08 |
| Plet1   | 0.03 | 1.92E-06 | 2.09E-04 |
| Sh2d1b1 | 0.01 | 8.36E-12 | 3.36E-09 |

#. Fold change is the ratio of expression of genes in P versus C cells at -2 day.

\$. Benjamini-Hochberg adjusted p-value.

### **Supplementary Table S1**

The list of genes similarly affected by Prep1 DR at day -2 and by induction of adipogenic differentiation control cells at day 1.

| <b>G.O. Category</b>                          | <b>P-value</b> | <b>P adj<sup>#</sup></b> | <b>Gene symbols</b>                                                                                                 |
|-----------------------------------------------|----------------|--------------------------|---------------------------------------------------------------------------------------------------------------------|
| fat cell differentiation<br>(GO:0045444)      | 8.45E-04       | 3.06E-02                 | CEBPA; CEBPB; EGR2; PID1; FABP4; LAMA4; RARRES2; PSMB8; FGF10                                                       |
| response to cAMP<br>(GO:0051591)              | 2.59E-05       | 3.40E-03                 | EGR1; THBD; EGR2; IGFBP5; STAT1; PDE3A; FOSB; MMP19; SDC1; FOS; CDO1                                                |
| response to glucocorticoid<br>(GO:0051384)    | 5.19E-04       | 2.33E-02                 | CEBPA; PAPP A; SDC1; FOSB; ALPL; ADM; SLIT3; AVPR1A; FOS; CDO1; EGFR                                                |
| single organism cell adhesion<br>(GO:0098602) | 2.33E-07       | 5.09E-04                 | CYFIP2; LAMA5; CDSN; JUP; PIK3CB; FNDC3A; SLC7A11; MERTK; EFNA1; PDPN; PKP1; ITGA6; PTPN6; ITGB7; ADAM8; PKP3; CD34 |

#. Benjamini-Hochberg adjusted p-value.

### **Supplementary Table S2**

Statistically significant enrichments for the gene ontology categories highlighted in Fig. 2D. Genes in these categories are shown.

| <b>-2 days</b>                                                | <b>C exc<sup>#</sup></b> | <b>Common* (C and P)</b> | <b>P exc</b> |
|---------------------------------------------------------------|--------------------------|--------------------------|--------------|
| GO 0045444<br>fat cell differentiation                        | 1                        | 9                        | 18           |
| GO 0045598<br>regulation of fat cell differentiation          | 0                        | 5                        | 13           |
| GO:0045600<br>positive regulation of fat cell differentiation | 0                        | 2                        | 7            |
| GO 0045599<br>negative regulation of fat cell differentiation | 0                        | 3                        | 5            |

| <b>4 hours</b>                                                | <b>C exc</b> | <b>Common (C and P)</b> | <b>P exc</b> |
|---------------------------------------------------------------|--------------|-------------------------|--------------|
| GO 0045444<br>fat cell differentiation                        | 0            | 56                      | 42           |
| GO 0045598<br>regulation of fat cell differentiation          | 0            | 58                      | 22           |
| GO:0045600<br>positive regulation of fat cell differentiation | 0            | 26                      | 11           |
| GO 0045599<br>negative regulation of fat cell differentiation | 0            | 23                      | 8            |
| GO 0050873<br>brown fat cell differentiation                  | 0            | 21                      | 9            |
| GO 0050872<br>white fat cell differentiation                  | 0            | 9                       | 2            |

#. exclusive genes. Peak-associated genes present only in P (or C) cells

\*. common genes. Peak-associated genes present in both P and C cells.

### **Supplementary Table S3**

Distribution of the enriched G.O. categories and the corresponding number of genes in P and C cells at -2 day and 4 hours after induction.
